# Supplementary material for: The moderate substitution of Astragalus sinicus returning for chemical fertilizer improves the N cycle function of key ecological bacterial clusters in soil
Source: Front Microbiol. 2023 Jan 5;13:1067939. doi: 10.3389/fmicb.2022.1067939 (PMC9850295; doi:10.3389/fmicb.2022.1067939)
Supplement: Supplementary file 1 [file Table_1.XLSX]

## Sheet: Supplementary table 1
	Richness	Shannon	Simpson	Pielou	Chao1	ACE	goods_coverage
CK1	2847	10.3987	0.998337	0.90619	3184.28	3110.99	0.985968
CK2	3040	10.505	0.998452	0.907963	3368.22	3352.16	0.984413
CK3	3036	10.4697	0.998256	0.905064	3376.71	3337.47	0.984565
CF1	3268	10.5675	0.998291	0.905206	3672.9	3623.57	0.982216
CF2	3225	10.5261	0.998204	0.903133	3615.76	3563.49	0.982613
CF3	3108	10.4783	0.998335	0.903164	3476.76	3436.76	0.983376
80A1	3137	10.4216	0.99806	0.897239	3563.78	3506.43	0.982094
80A2	3053	10.4169	0.997893	0.899869	3417.78	3390.34	0.983589
80A3	3019	10.5062	0.998339	0.908855	3292.24	3270.44	0.98612
80D1	3014	10.3924	0.998011	0.899192	3336.07	3311.51	0.984657
80D2	2753	10.2713	0.997892	0.898882	3022.06	3004.57	0.986822
80D3	3091	10.5028	0.998335	0.905896	3439.24	3407.49	0.983924

## Sheet: Supplementary table 2
BDtotal	Repl	RichDif	Repl/BDtotal	RichDif/BDtotal
0.323761	0.30595	0.0178112	0.944987	0.0550134
BDtotal	Repl	RichDif	Repl/BDtotal	RichDif/BDtotal
0.302731	0.287478	0.0152531	0.949615	0.0503851
BDtotal	Repl	RichDif	Repl/BDtotal	RichDif/BDtotal
0.305689	0.294109	0.0115802	0.962118	0.0378822
BDtotal	Repl	RichDif	Repl/BDtotal	RichDif/BDtotal
0.314434	0.305681	0.00875248	0.972164	0.0278357
BDtotal	Repl	RichDif	Repl/BDtotal	RichDif/BDtotal
0.312829	0.286533	0.0262958	0.915942	0.084058

## Sheet: Supplementary table 3
Taxonomy	Acidobacteriota	Proteobacteria	Chloroflexi	Nitrospirota	Bacteroidota	Myxococcota	Actinobacteriota	Desulfobacterota	Verrucomicrobiota	Gemmatimonadota	Sva0485	Firmicutes	Others
CK1	0.272123	0.240033	0.162035	0.0511241	0.0470976	0.0471281	0.0436507	0.0157704	0.0231217	0.0216576	0.0067108	0.0126895	0.050819
CK2	0.284995	0.206754	0.159076	0.0786993	0.0480737	0.0396852	0.0348656	0.0232133	0.0271177	0.0151908	0.0134826	0.00918159	0.0517646
CK3	0.24531	0.229845	0.152335	0.103956	0.0545405	0.0292835	0.0301071	0.0263551	0.0220236	0.0122625	0.0169905	0.0150383	0.0531983
CF1	0.214288	0.254431	0.160937	0.0869658	0.05512	0.0470976	0.0362383	0.0237623	0.0240979	0.0173566	0.0130555	0.00860202	0.0494463
CF2	0.221822	0.246225	0.166763	0.0887045	0.0642711	0.0392276	0.0315712	0.0257145	0.0242199	0.0155568	0.0182412	0.00814447	0.0410884
CF3	0.226428	0.209743	0.188421	0.092792	0.0589025	0.0406613	0.0291004	0.0268127	0.0196138	0.0189427	0.0197663	0.00994418	0.0460909
LA1	0.252722	0.203398	0.184181	0.0986487	0.0598786	0.0340115	0.0286734	0.0230607	0.0197663	0.0186377	0.0148858	0.0131776	0.0406003
LA2	0.22655	0.257084	0.142665	0.0850441	0.0671385	0.0466705	0.0307171	0.0260196	0.0246774	0.0140927	0.0137876	0.00857152	0.0481347
LA3	0.2243	0.244006	0.175828	0.0758953	0.0590873	0.0401745	0.0345006	0.0279117	0.0170215	0.0185468	0.0160454	0.0136355	0.0423098
HA1	0.263399	0.274746	0.141018	0.0574383	0.0526797	0.0435897	0.0416069	0.0203459	0.0175396	0.0218406	0.00771742	0.012415	0.0389226
HA2	0.240887	0.300308	0.111369	0.0819632	0.0567062	0.0518866	0.0370314	0.0240063	0.0131776	0.0118964	0.00905957	0.0156789	0.0388006
HA3	0.248925	0.249809	0.150423	0.0697965	0.0654953	0.044477	0.0355389	0.0242213	0.0135139	0.0186694	0.0153137	0.0129953	0.0429212

## Sheet: Supplementary table 4
	Unique	Average.share	Individual	I.perc(%)
AP	0.0751	0.035	0.1101	11.01
TN	0.0852	0.0116	0.0968	9.68
AHN	0.0866	0.008	0.0946	9.46
NN	0.0827	0.0107	0.0934	9.34
TP	0.0779	0.014	0.0919	9.19
TK	0.0833	0.0074	0.0907	9.07
pH	0.0867	0.0023	0.089	8.9
H2O	0.0843	0.0033	0.0876	8.76
OM	0.0837	0.0005	0.0842	8.42
AN	0.0815	0.001	0.0825	8.25
AK	0.0764	0.0029	0.0793	7.93

## Sheet: Supplementary table 5
ME	VIP
MEpurple	1.26063
MEgreen	1.25896
MEturquoise	1.22718
MEsalmon	1.14045
MEyellow	1.11175
MEblue	1.07399
MEblack	1.07275
MEred	1.05217
MEcyan	1.04654
MEbrown	1.00105
MEpink	0.909997
MEgrey	0.844195
MEgreenyellow	0.777798
MEmidnightblue	0.728311
MEtan	0.596473
MEmagenta	0.492551

## Sheet: Supplementary table 4 (2)
ME	VIP
MEpurple	1.26063
MEgreen	1.25896
MEturquoise	1.22718
MEsalmon	1.14045
MEyellow	1.11175
MEblue	1.07399
MEblack	1.07275
MEred	1.05217
MEcyan	1.04654
MEbrown	1.00105
MEpink	0.909997
MEgrey	0.844195
MEgreenyellow	0.777798
MEmidnightblue	0.728311
MEtan	0.596473
MEmagenta	0.492551

## Sheet: Supplementary table 6
ID	HeS	HoS	DL	HD	DR
CK	0.0029229	0.24667	0.0646513	0.0206305	0.665125
CF	0.0011628	0.233884	0.0439549	0.0403312	0.680667
80A	0.00112916	0.245678	0.0619557	0.0238096	0.667427
80D	0.000962732	0.24179	0.050515	0.0246578	0.682075
